# Supplementary material for: RAFT dispersion polymerization of benzyl methacrylate in non-polar media using hydrogenated polybutadiene as a steric stabilizer block
Source: Royal Society of Chemistry journal article supplement (doi:10.1039/d0py01371d), 2020-01-01
Supplement: d0py01371d1.pdf [file d0py01371d1.pdf]

## Supporting Information for:

### ***RAFT dispersion polymerization of benzyl methacrylate in non-polar media using hydrogenated polybutadiene as a steric stabilizer block***

**Bastien Darmau, Matthew J. Rymaruk\*, Nicholas J. Warren, Robert Bening and Steven P. Armes\***

#### **Summary of the additional synthesis details and characterization data**

- S2.** Additional experimental details for the PISA formulations used in this study
- S3.** UV GPC curves recorded at 298 nm for the small molecule CTA and the PhB<sub>80</sub> macro-CTA
- S4.** UV spectra and Beer-Lambert plot recorded for the trithiocarbonate-based RAFT agent
- S5.** Summary of the diblock copolymer characterization data used to construct the phase diagram
- S6.** GPC curves recorded for PHB<sub>80</sub>-PBzMA<sub>40</sub> using UV and refractive index detectors
- S7.** Plot of GPC M<sub>n</sub> vs. target PBzMA DP for a series of five PhBD<sub>80</sub>-PBzMA<sub>x</sub> diblock copolymers and the corresponding PhBD<sub>80</sub> macro-CTA
- S8.** Storage and loss moduli recorded during a strain sweep conducted on PhBD<sub>80</sub>-PBzMA<sub>40</sub> worms in *n*-dodecane over a range of copolymer concentrations
- S9.** Storage and loss moduli recorded during a frequency sweep conducted on PhBD<sub>80</sub>-PBzMA<sub>40</sub> worms in *n*-dodecane over a range of copolymer concentrations

## **Additional experimental details for the PISA formulations used in this study**

### **Synthesis of PhBD-PBzMA worms by RAFT dispersion polymerization of BzMA**

A typical synthesis of PhBD-PBzMA<sub>40</sub> worms at 40% w/w in *n*-dodecane was conducted as follows: PhBD RAFT agent (0.30 g, 62.0 μmol), BzMA (0.42 g, 2.39 mmol, target DP = 40 assuming a mean degree of esterification of 96% for this PhBD precursor) and *n*-dodecane (1.08 g) were weighed into a 10 mL glass vial equipped with a magnetic stirrer. T21s initiator (2.70 mg, 12.4 μmol, [PhBD]/[T21s] molar ratio = 5.0; 29 μL of a 10% v/v solution in *n*-dodecane) was added to this solution at 20 °C. The resulting mixture was then purged with nitrogen, sealed, and placed in a pre-heated oil bath set at 90 °C for 5 h. After cooling to 25 °C, the final dispersion was obtained as a yellow free-standing gel. <sup>1</sup>H NMR spectroscopy studies (CDCl<sub>3</sub>) confirmed a BzMA conversion of 99 %, and THF GPC indicated an M<sub>n</sub> of 14 300 g mol<sup>-1</sup> and an M<sub>w</sub>/M<sub>n</sub> of 1.17.

### **Synthesis of PhBD-PBzMA spheres by RAFT dispersion polymerization of BzMA**

A typical synthesis of PhBD-PBzMA<sub>300</sub> spheres at 25% w/w in *n*-dodecane was conducted as follows: PhBD RAFT agent (0.10 g, 23.1 μmol), BzMA (1.15 g, 6.50 mmol, target DP = 300 assuming a mean degree of esterification of 95% for this PhBD precursor) and *n*-dodecane (3.74 g) were weighed into a 10 mL glass vial equipped with a magnetic stirrer. T21s initiator (1.0 mg, 4.63 μmol, [PhBD]/[T21s] molar ratio = 5.0; 11 μL of a 10% v/v solution in *n*-dodecane) was added to this solution at 20 °C. The resulting mixture was then purged with nitrogen, sealed, and placed in a pre-heated oil bath set at 90 °C for 5 h. After cooling to 25 °C, the final dispersion was obtained as a turbid yellow free-flowing dispersion. <sup>1</sup>H NMR spectroscopy studies

(CDCl<sub>3</sub>) confirmed a BzMA conversion of 98 %, and THF GPC analysis indicated an M<sub>n</sub> of 50 000 g mol<sup>-1</sup> and an M<sub>w</sub>/M<sub>n</sub> of 1.23.

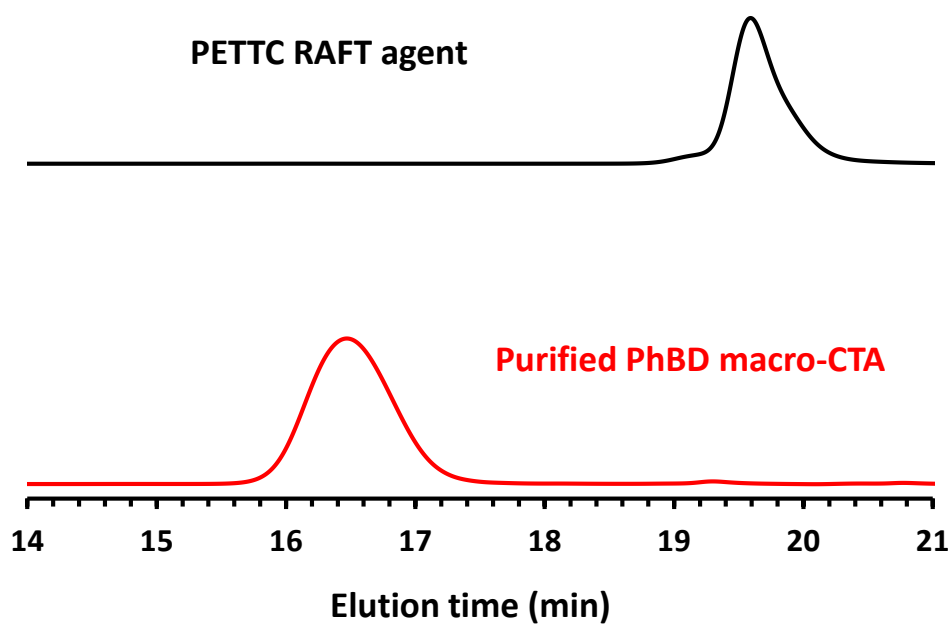

**Figure S1.** UV GPC curves recorded at  $\lambda = 298$  nm using THF eluent for PETTC RAFT agent and the purified PhBD<sub>80</sub> macro-CTA. The absence of any PETTC signal in the PhBD<sub>80</sub> macro-CTA GPC trace confirms that the purification protocol was successful.

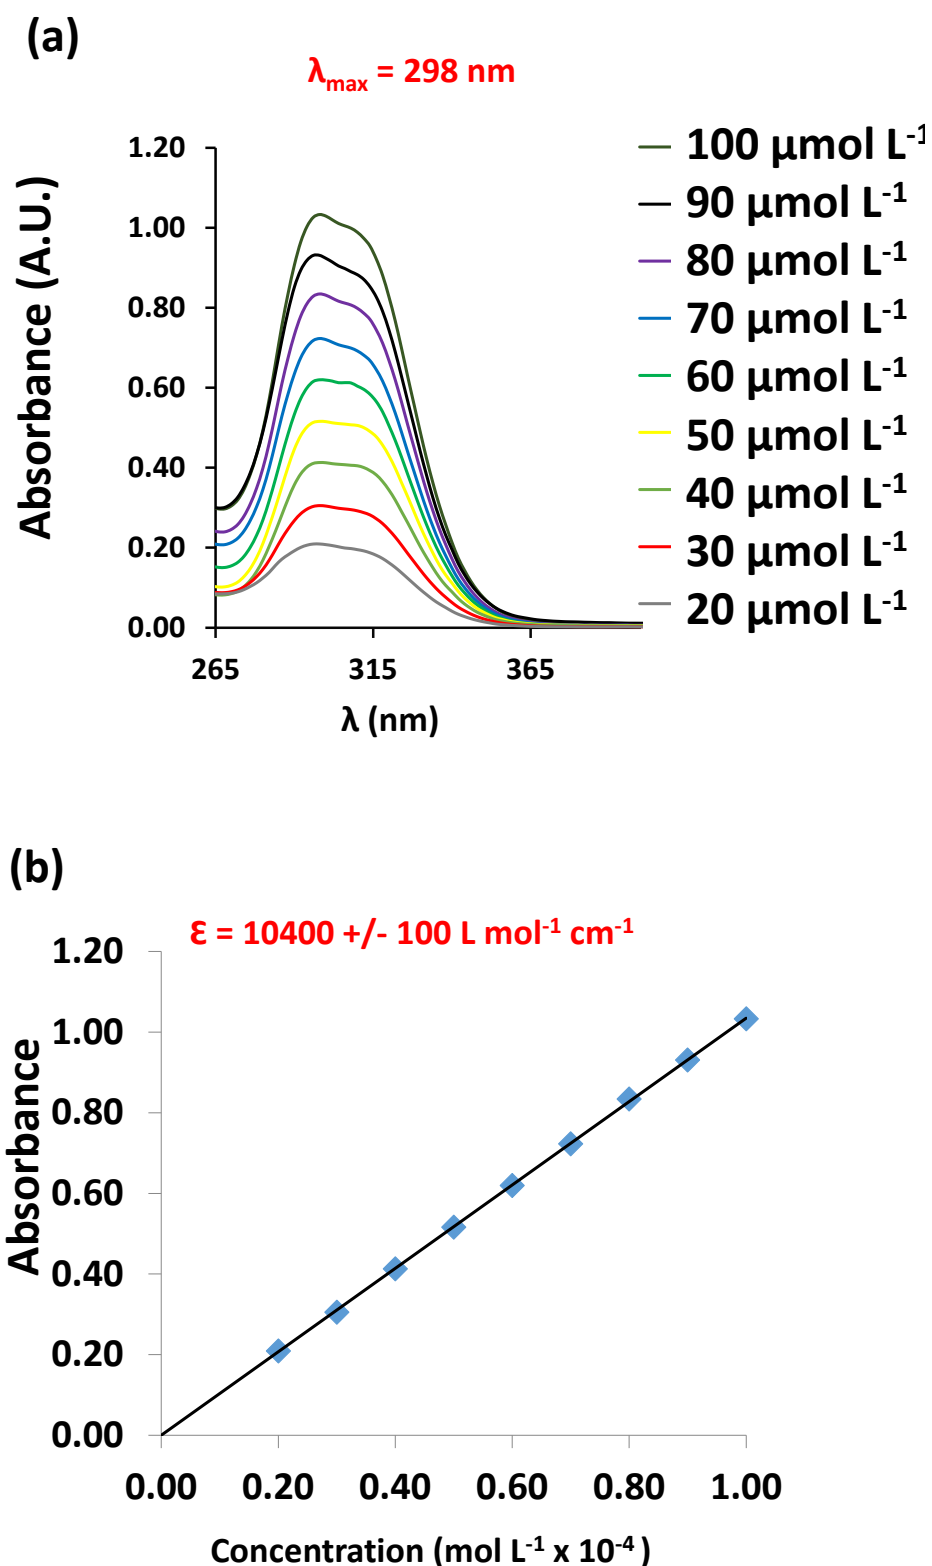

**Figure S2.** (a) UV spectra recorded for the PETTC RAFT agent dissolved in dichloromethane at various concentrations. (b) Beer-Lambert calibration curve constructed using the absorbance data shown in (a).

**Table S1.** Summary of characterization data obtained for the diblock copolymers used to construct the phase diagram. BzMA conversions were determined by <sup>1</sup>H NMR, molecular weights were assessed via THF GPC and calibrated against near-monodisperse PMMA standards.

| Target Diblock Copolymer Composition     | Copolymer concentration %w/w | BzMA conversion % | M <sub>n</sub> | M <sub>w</sub> /M <sub>n</sub> | Copolymer morphology assigned by TEM |
|------------------------------------------|------------------------------|-------------------|----------------|--------------------------------|--------------------------------------|
| PhBD <sub>80</sub> -PBzMA <sub>40</sub>  | 45                           | 98                | 14 600         | 1.10                           | Worms                                |
| PhBD <sub>80</sub> -PBzMA <sub>50</sub>  | 45                           | 99                | 17 000         | 1.10                           | Worms                                |
| PhBD <sub>80</sub> -PBzMA <sub>60</sub>  | 45                           | 99                | 18 000         | 1.13                           | Mixed                                |
| PhBD <sub>80</sub> -PBzMA <sub>70</sub>  | 45                           | 97                | 19 100         | 1.13                           | Mixed                                |
| PhBD <sub>80</sub> -PBzMA <sub>80</sub>  | 45                           | 99                | 19 900         | 1.20                           | Mixed                                |
| PhBD <sub>80</sub> -PBzMA <sub>100</sub> | 45                           | 99                | 24 700         | 1.13                           | Mixed                                |
| PhBD <sub>80</sub> -PBzMA <sub>150</sub> | 45                           | 98                | 33 000         | 1.15                           | Mixed                                |
| PhBD <sub>80</sub> -PBzMA <sub>200</sub> | 45                           | 98                | 39 600         | 1.22                           | Vesicles                             |
| PhBD <sub>80</sub> -PBzMA <sub>250</sub> | 45                           | 98                | 42 300         | 1.18                           | Vesicles                             |
| PhBD <sub>80</sub> -PBzMA <sub>300</sub> | 45                           | 98                | 52 800         | 1.21                           | Vesicles                             |
| PhBD <sub>80</sub> -PBzMA <sub>40</sub>  | 40                           | 97                | 14 300         | 1.10                           | Worms                                |
| PhBD <sub>80</sub> -PBzMA <sub>50</sub>  | 40                           | 98                | 17 100         | 1.11                           | Worms                                |
| PhBD <sub>80</sub> -PBzMA <sub>60</sub>  | 40                           | 98                | 18 100         | 1.13                           | Mixed                                |
| PhBD <sub>80</sub> -PBzMA <sub>70</sub>  | 40                           | 98                | 19 200         | 1.13                           | Mixed                                |
| PhBD <sub>80</sub> -PBzMA <sub>80</sub>  | 40                           | 96                | 20 200         | 1.16                           | Mixed                                |
| PhBD <sub>80</sub> -PBzMA <sub>150</sub> | 40                           | 98                | 30 400         | 1.16                           | Mixed                                |
| PhBD <sub>80</sub> -PBzMA <sub>200</sub> | 40                           | 99                | 37 500         | 1.19                           | Mixed                                |
| PhBD <sub>80</sub> -PBzMA <sub>250</sub> | 40                           | 98                | 43 300         | 1.19                           | Vesicles                             |
| PhBD <sub>80</sub> -PBzMA <sub>300</sub> | 40                           | 98                | 49 600         | 1.20                           | Vesicles                             |
| PhBD <sub>80</sub> -PBzMA <sub>30</sub>  | 35                           | 97                | 13 900         | 1.10                           | Mixed                                |
| PhBD <sub>80</sub> -PBzMA <sub>40</sub>  | 35                           | 98                | 14 700         | 1.10                           | Mixed                                |
| PhBD <sub>80</sub> -PBzMA <sub>50</sub>  | 35                           | 98                | 17 200         | 1.10                           | Mixed                                |
| PhBD <sub>80</sub> -PBzMA <sub>60</sub>  | 35                           | 98                | 18 700         | 1.13                           | Mixed                                |
| PhBD <sub>80</sub> -PBzMA <sub>70</sub>  | 35                           | 97                | 19 600         | 1.14                           | Mixed                                |
| PhBD <sub>80</sub> -PBzMA <sub>100</sub> | 35                           | 98                | 24 300         | 1.12                           | Mixed                                |
| PhBD <sub>80</sub> -PBzMA <sub>150</sub> | 35                           | 98                | 30 700         | 1.15                           | Mixed                                |
| PhBD <sub>80</sub> -PBzMA <sub>200</sub> | 35                           | 98                | 38 200         | 1.17                           | Mixed                                |
| PhBD <sub>80</sub> -PBzMA <sub>250</sub> | 35                           | 98                | 45 500         | 1.19                           | Mixed                                |
| PhBD <sub>80</sub> -PBzMA <sub>300</sub> | 35                           | 98                | 56 100         | 1.25                           | Vesicles                             |
| PhBD <sub>80</sub> -PBzMA <sub>30</sub>  | 30                           | 96                | 13 700         | 1.10                           | Spheres                              |
| PhBD <sub>80</sub> -PBzMA <sub>50</sub>  | 30                           | 97                | 17 200         | 1.10                           | Spheres                              |
| PhBD <sub>80</sub> -PBzMA <sub>100</sub> | 30                           | 98                | 23 900         | 1.13                           | Spheres                              |
| PhBD <sub>80</sub> -PBzMA <sub>150</sub> | 30                           | 98                | 30 800         | 1.15                           | Mixed                                |
| PhBD <sub>80</sub> -PBzMA <sub>200</sub> | 30                           | 98                | 37 600         | 1.17                           | Mixed                                |
| PhBD <sub>80</sub> -PBzMA <sub>250</sub> | 30                           | 98                | 45 900         | 1.20                           | Mixed                                |
| PhBD <sub>80</sub> -PBzMA <sub>300</sub> | 30                           | 98                | 50 000         | 1.22                           | Mixed                                |
| PhBD <sub>80</sub> -PBzMA <sub>30</sub>  | 25                           | 98                | 13 400         | 1.10                           | Spheres                              |
| PhBD <sub>80</sub> -PBzMA <sub>50</sub>  | 25                           | 97                | 17 400         | 1.11                           | Spheres                              |
| PhBD <sub>80</sub> -PBzMA <sub>100</sub> | 25                           | 97                | 24 700         | 1.12                           | Spheres                              |
| PhBD <sub>80</sub> -PBzMA <sub>150</sub> | 25                           | 98                | 32 200         | 1.15                           | Spheres                              |
| PhBD <sub>80</sub> -PBzMA <sub>200</sub> | 25                           | 98                | 44 700         | 1.21                           | Spheres                              |
| PhBD <sub>80</sub> -PBzMA <sub>250</sub> | 25                           | 98                | 45 000         | 1.20                           | Spheres                              |
| PhBD <sub>80</sub> -PBzMA <sub>300</sub> | 25                           | 98                | 50 100         | 1.23                           | Spheres                              |

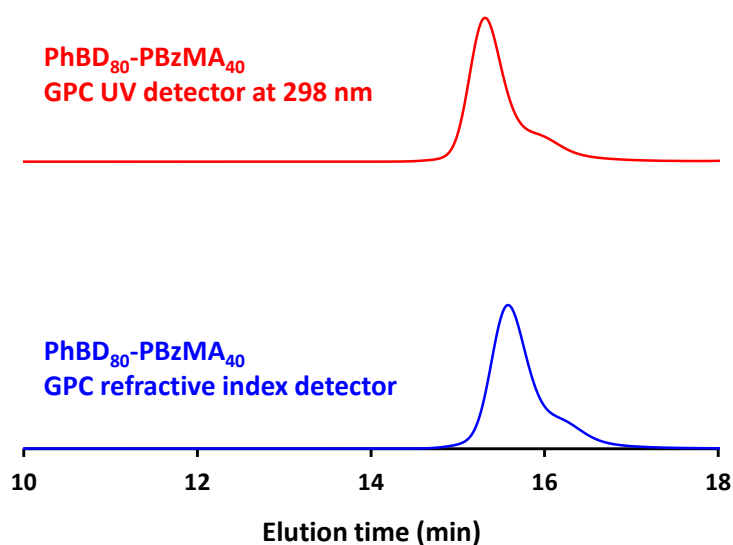

**Figure S3.** GPC curves obtained for PhBD<sub>80</sub>-PBzMA<sub>40</sub> diblock copolymers prepared at 40% w/w in *n*-dodecane recorded using either a UV detector tuned to 298 nm (upper red curve) or a refractive index (RI) detector (lower blue curve) [N.B. The UV detector was connected in series with the RI detector, hence these two curves are offset by approximately 30 seconds]. The presence of a low molecular weight shoulder in both curves indicates that this feature corresponds to unreacted trithiocarbonate-capped PhBD macro-CTA, rather than non-esterified PhBD precursor (because the latter species does not absorb at 298 nm).

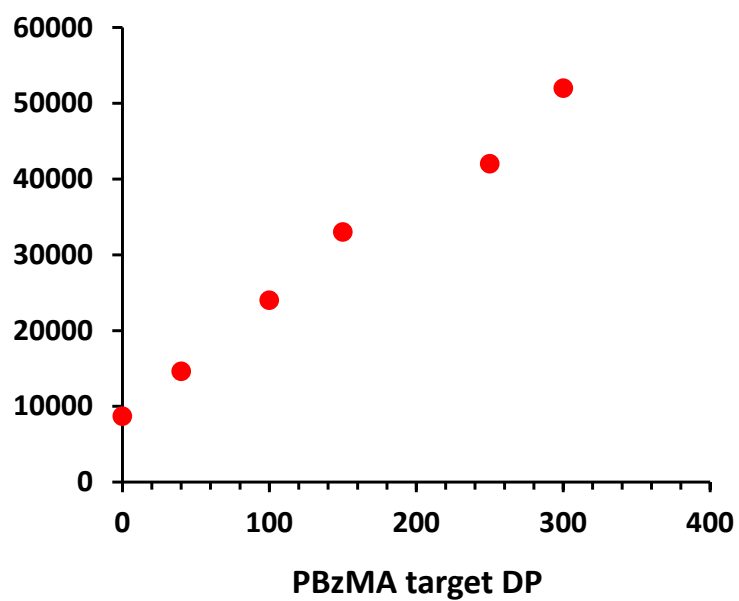

**Figure S4.** Plot of GPC  $M_n$  vs. target PBzMA DP (obtained using THF eluent and a series of PMMA standards) for a series of five PhBD<sub>80</sub>-PBzMA<sub>x</sub> diblock copolymers and the corresponding PhBD<sub>80</sub> macro-CTA prepared at 45% w/w solids in *n*-dodecane.

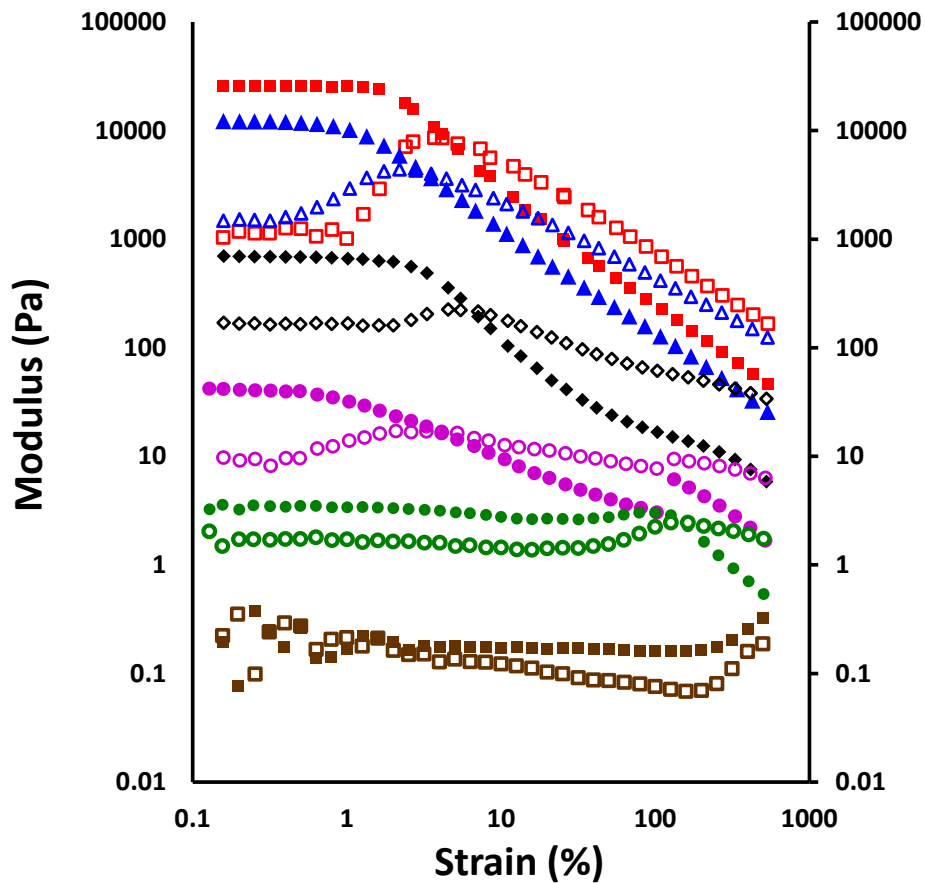

**Figure S5.** Storage moduli ( $G'$ ; filled symbols) and loss moduli ( $G''$ ; open symbols) obtained during a strain sweep conducted on PhBD<sub>80</sub>-PBzMA<sub>40</sub> worms over a range of copolymer concentrations in *n*-dodecane: 40% w/w (red squares), 30% w/w (blue triangles), 20% w/w (black diamonds), 8% w/w (purple circles), 6% w/w (green circles) and 5% w/w (brown squares). In each case, the angular frequency was fixed at 1.0 rad s<sup>-1</sup>.



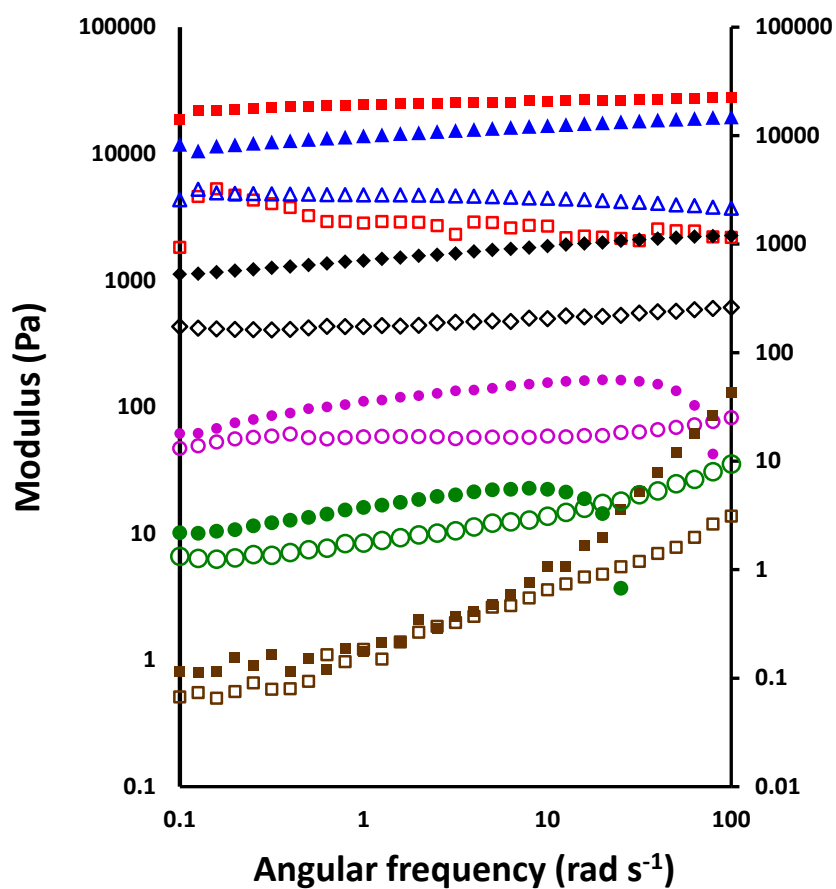

**Figure S6.** Storage moduli ( $G'$ ; filled symbols) and loss moduli ( $G''$ ; open symbols) obtained during a frequency sweep conducted on PhBD<sub>80</sub>-PBzMA<sub>40</sub> worms over a range of copolymer concentrations in *n*-dodecane: 40% w/w (red squares), 30% w/w (blue triangles), 20% w/w (black diamonds), 8% w/w (purple circles), 6% w/w (green circles) and 5% w/w (brown squares). In each case, the applied strain was 1%.
